# Supplementary material for: In situ synthesis of titanium doped hybrid metal–organic framework UiO-66 with enhanced adsorption capacity for organic dyes
Source: Royal Society of Chemistry journal article supplement (doi:10.1039/c7qi00437k), 2017-01-01
Supplement: c7qi00437k1.pdf [file c7qi00437k1.pdf]

## Supporting information

for

### ***In-Situ* Synthesis of Titanium Doped Hybrid Metal-Organic framework UiO-66 with Enhanced Adsorption Capacity for Organic Dye**

Yitong Han<sup>a</sup>, Min Liu<sup>a</sup>, Keyan Li<sup>a</sup>, Qiao Sun<sup>a</sup>, Wensheng Zhang<sup>a</sup>, Chunshan Song<sup>ab</sup>, Guoliang Zhang<sup>c</sup>, Z. Conrad Zhang<sup>d\*</sup> and Xinwen Guo<sup>a\*</sup>

<sup>a</sup> State Key Laboratory of Fine Chemicals, PSU-DUT Joint Center for Energy Research, School of Chemical Engineering, Dalian University of Technology, Dalian 116024, PR China

<sup>b</sup> EMS Energy Institute, PSU-DUT Joint Center for Energy Research and Department of Energy & Mineral Engineering, Pennsylvania State University, University Park, Pennsylvania 16802, United States

<sup>c</sup> College of Biological and Environmental Engineering, Zhejiang University of Technology, Hangzhou 310014, PR China

<sup>d</sup> Dalian National Laboratory for Clean Energy, Dalian Institute of Chemical Physics, Chinese Academy of Sciences, Dalian 116023, PR China

\* Corresponding authors, (X.G.) E-mail: guoxw@dlut.edu.cn, Fax: +86-0411-84986134, Tel: +86-0411-84986133; (Z.Z.) E-mail: zczhang@yahoo.com, Fax: +86-0411-84379462, Tel: +86-0411-84379462.

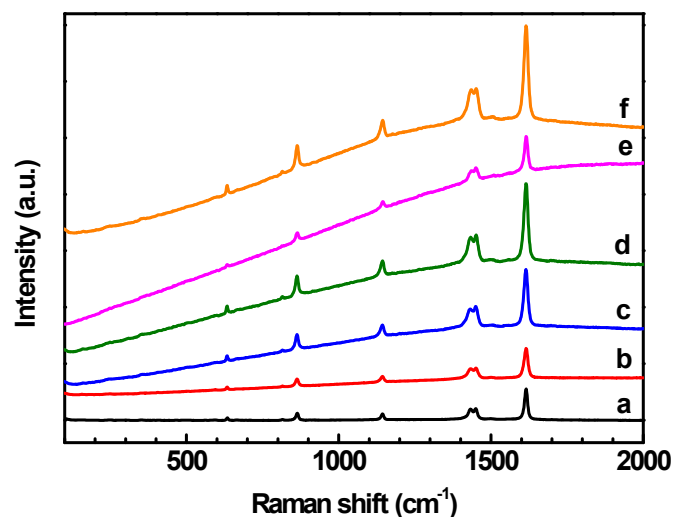

Fig. S1 Raman spectra of the parent UiO-66 (a), UiO-66-0.7Ti (b), UiO-66-1.4Ti (c), UiO-66-2.1Ti (d), UiO-66-2.7Ti (e) and UiO-66-4.0Ti (f), the excitation wavelength is 532 nm.

The Raman spectrum of an anatase-phase  $\text{TiO}_2$  is a combination of six peaks appear at  $144 \text{ cm}^{-1}$ ,  $197 \text{ cm}^{-1}$ ,  $399 \text{ cm}^{-1}$ ,  $513 \text{ cm}^{-1}$ ,  $519 \text{ cm}^{-1}$  and  $640 \text{ cm}^{-1}$ .<sup>1</sup> Therefore, as illustrated in Fig. S1, the Raman spectrum of the  $\text{Ti}^{4+}$  doped UiO-66 samples only show the common features seen for the parent UiO-66,<sup>2</sup> demonstrating the pure phase of the samples.

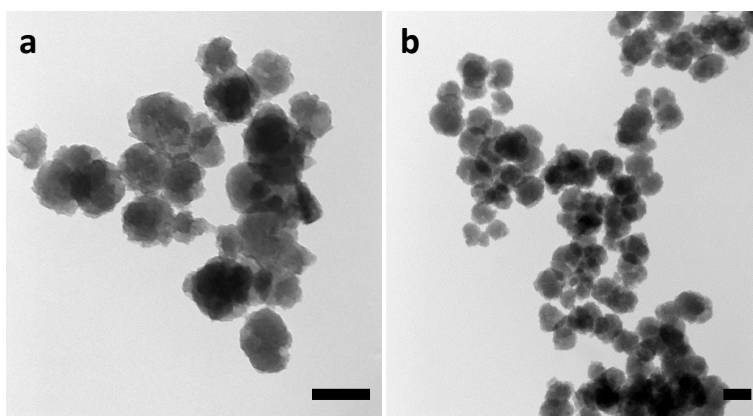

Fig. S2 TEM images of UiO-66-2.7Ti with different magnification. (a)  $20 \times 10^4$ , (b)  $10 \times 10^4$ , each scale bar is 100 nm.

Table S1 XPS data for the surface Ti/Zr molar ratio in the UiO-66-nTi MOFs.

| Sample       | XPS for the surface   |
|--------------|-----------------------|
|              | Ti/Zr molar ratio (%) |
| UiO-66-0.7Ti | 8.6                   |
| UiO-66-1.4Ti | 17.2                  |
| UiO-66-2.1Ti | 15.7                  |
| UiO-66-2.7Ti | 16.1                  |
| UiO-66-4.0Ti | 17.3                  |

Table S2 Comparison of weight loss values (%) of the synthesized samples at different temperature interval.

| Sample       | Weight loss temperature interval (°C) |         |         | Stoichiometric <sup>a</sup><br>450–700 °C |
|--------------|---------------------------------------|---------|---------|-------------------------------------------|
|              | Measured (%)                          |         |         |                                           |
|              | 30–200                                | 200–350 | 450–700 |                                           |
| UiO-66       | 1.9                                   | 10.6    | 43.5    | 54.6 <sup>3</sup>                         |
| UiO-66-0.7Ti | 3.9                                   | 7.3     | 42.2    | -                                         |
| UiO-66-1.4Ti | 5.0                                   | 7.1     | 38.2    | -                                         |
| UiO-66-2.1Ti | 6.0                                   | 7.2     | 39.3    | -                                         |
| UiO-66-2.7Ti | 6.3                                   | 7.3     | 35.9    | -                                         |
| UiO-66-4.0Ti | 1.3                                   | 7.5     | 37.7    | -                                         |

<sup>a</sup> stoichiometrically perfect framework

Table S3 Dyes used in the adsorption experiments in this work. <sup>4-6</sup>

|                | Structure                                                                                                                          | Molecular Formula           | Mw  |
|----------------|------------------------------------------------------------------------------------------------------------------------------------|-----------------------------|-----|
| Congo Red      | 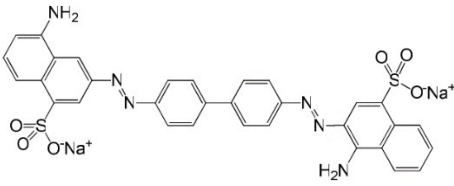<br>$(20.2 \times 10.1 \times 10.2 \text{ \AA})$  | $C_{32}H_{22}N_6Na_2O_6S_2$ | 697 |
| Methyl Orange  | <br>$(13.1 \times 5.5 \times 1.8 \text{ \AA})$    | $C_{14}H_{14}N_3SO_3Na$     | 327 |
| Methylene Blue | <br>$(13.9 \times 5.0 \times 4.3 \text{ \AA})$    | $C_{16}H_{18}N_3SCl$        | 320 |
| Rhodamine B    | <br>$(15.9 \times 11.8 \times 5.6 \text{ \AA})$ | $C_{28}H_{31}N_2O_3Cl$      | 479 |

### Adsorption Kinetics

The experimental data of the adsorption of CR ( $400 \text{ mg}\cdot\text{L}^{-1}$ ) on the parent UiO-66 and UiO-66-2.7Ti were fit by pseudo-first-order and pseudo-second-order kinetic equations to investigate the adsorption kinetic.

Pseudo-first-order equation:  $\ln(Q_e - Q_t) = \ln Q_e - k_1 t$  (1)

Pseudo-second-order equation:  $\frac{t}{Q_t} = \frac{1}{k_2} \cdot \frac{1}{Q_e^2} + \frac{t}{Q_e}$  (2)

where  $Q_e$  ( $\text{mg}\cdot\text{g}^{-1}$ ) is the equilibrium adsorption capacity,  $Q_t$  ( $\text{mg}\cdot\text{g}^{-1}$ ) is the adsorption capacity at time  $t$  (min), and  $k_1$  ( $\text{min}^{-1}$ ) and  $k_2$  ( $\text{g}\cdot\text{min}^{-1}\cdot\text{mg}^{-1}$ ) are rate constants of the pseudo-first-order and pseudo-second-order equations, respectively.

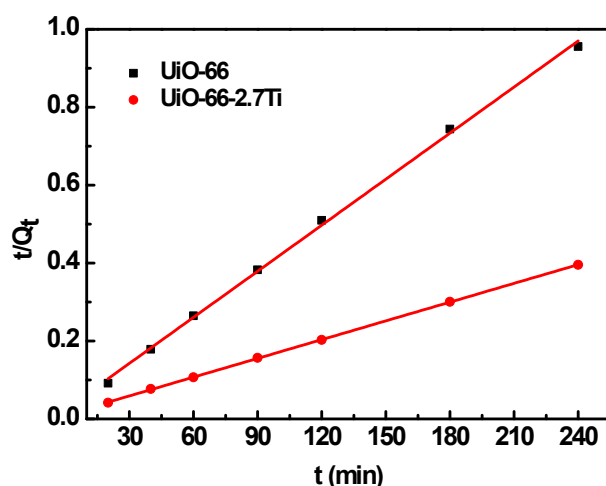

Fig. S3 Plots of pseudo-second-order kinetics for the adsorption of CR on the parent UiO-66 and UiO-66-2.7Ti.

Table S4 Kinetic parameters of the adsorption of CR on the parent UiO-66 and UiO-66-2.7Ti.

| Sample       | $Q_{e, \text{exp}}$<br>( $\text{mg} \cdot \text{g}^{-1}$ ) | Pseudo-first-order-model                                   |                                |        | Pseudo-second-order-model                                  |                                                                      |        |
|--------------|------------------------------------------------------------|------------------------------------------------------------|--------------------------------|--------|------------------------------------------------------------|----------------------------------------------------------------------|--------|
|              |                                                            | $Q_{e, \text{cal}}$<br>( $\text{mg} \cdot \text{g}^{-1}$ ) | $k_1$<br>( $\text{min}^{-1}$ ) | $R^2$  | $Q_{e, \text{cal}}$<br>( $\text{mg} \cdot \text{g}^{-1}$ ) | $k_2$ ( $\text{g} \cdot \text{min}^{-1}$<br>$\cdot \text{mg}^{-1}$ ) | $R^2$  |
| UiO-66       | 251                                                        | 68                                                         | 0.0163                         | 0.4993 | 256                                                        | $6.2536 \times 10^{-4}$                                              | 0.9987 |
| UiO-66-2.7Ti | 607                                                        | 557                                                        | 0.0412                         | 0.7112 | 625                                                        | $2.3681 \times 10^{-4}$                                              | 0.9999 |

### Adsorption Isotherms

Langmuir and Freundlich equations were used for describing the adsorption of CR on the samples.

$$\frac{C_e}{Q_e} = \frac{1}{K_l} \cdot \frac{1}{Q_m} + \frac{C_e}{Q_m}$$

The Langmuir equation: (3)

$$\ln Q_e = \ln K_f + \frac{1}{n} \cdot \ln C_e$$

The Freundlich equation: (4)

where  $C_e$  ( $\text{mg} \cdot \text{L}^{-1}$ ) is equilibrium concentration of dye solution,  $Q_e$  ( $\text{mg} \cdot \text{g}^{-1}$ ) is the amount adsorbed at equilibrium,  $Q_m$  ( $\text{mg} \cdot \text{g}^{-1}$ ) represents the adsorption capacity limit

of CR per unit mass of adsorbent,  $K_l$  ( $L \cdot mg^{-1}$ ) is a Langmuir constant which indicates the affinity of CR toward the adsorbent.  $K_f$  ( $mg^{1-1/n} \cdot L^{1/n} \cdot g^{-1}$ ) and  $1/n$  are Freundlich constants, related to adsorption capacity and adsorption intensity, respectively.

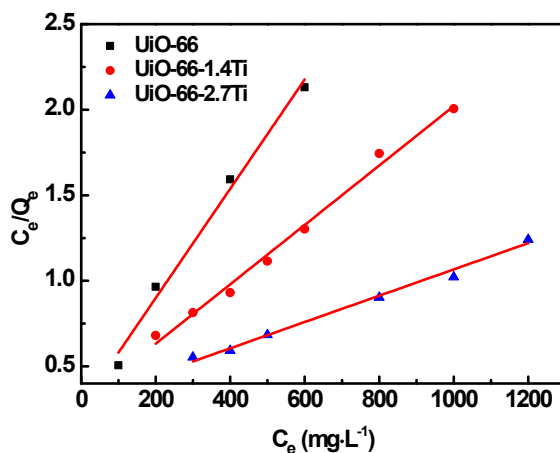

Fig. S4 Langmuir plots of isotherms for the adsorption of CR on the parent UiO-66, UiO-66-1.4Ti and UiO-66-2.7Ti.

Table S5 Langmuir and Freundlich model parameters of the adsorption of CR on the parent UiO-66, UiO-66-1.4Ti and UiO-66-2.7Ti.

| sample       | Langmuir isotherm              |                                |        | Freundlich isotherm                      |        |        |
|--------------|--------------------------------|--------------------------------|--------|------------------------------------------|--------|--------|
|              | $Q_m$<br>( $mg \cdot g^{-1}$ ) | $K_l$<br>( $L \cdot mg^{-1}$ ) | $R^2$  | $K_f$<br>( $mg^{1-1/n} L^{1/n} g^{-1}$ ) | $n$    | $R^2$  |
| UiO-66       | 313                            | 0.0122                         | 0.9853 | 88.4626                                  | 5.6863 | 0.1249 |
| UiO-66-1.4Ti | 575                            | 0.0061                         | 0.9901 | 58.9241                                  | 3.1326 | 0.8382 |
| UiO-66-2.7Ti | 1315                           | 0.0025                         | 0.9892 | 29.8144                                  | 1.9903 | 0.9537 |

#### *Synthesis of sample UiO-66(Ti)*

UiO-66(Ti) was synthesized via a modified post-grafting method. TOPT was mixed with 0.2 g the as-synthesized parent UiO-66 in 20 mL of toluene, and then the mixture was heated at 110 °C for 24 h. In order to compare the adsorption capacity with UiO-66-2.7Ti, the feeding molar ratio of Ti/Zr in the synthesis was 20% (the

mass percentage of Zr in the parent UiO-66 was calculated by the TGA data). After the treatment, the obtained sample was washed by toluene and methanol for several times and dried at 60 °C under vacuum.

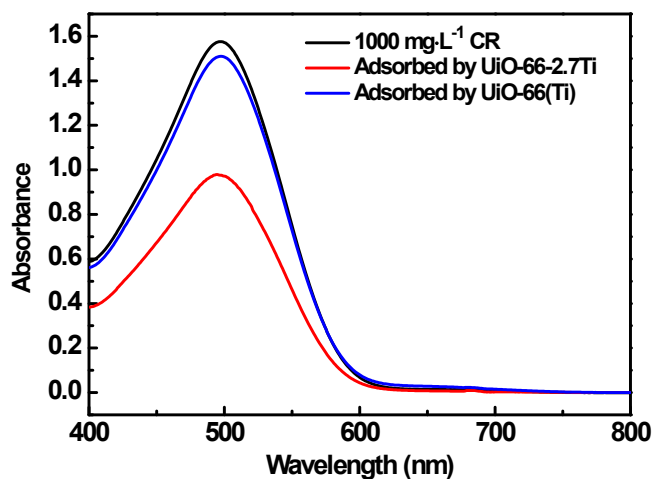

Fig. S5 UV-vis adsorption spectra of CR before (black curve) and after (red and blue curves) adsorption treatment with UiO-66-2.7Ti and UiO-66(Ti) ( $t = 4$  h,  $\text{pH} = 7$ ,  $\text{dyes} = 1000 \text{ mg}\cdot\text{L}^{-1}$ ,  $\text{does} = 0.5 \text{ g}\cdot\text{L}^{-1}$ ,  $T = 35 \text{ }^\circ\text{C}$ ).

Table S6 Zeta potentials of the synthesized samples in ultrapure water ( $\text{pH} = 7$ ).

| Sample       | Zeta potentials<br>(mV) |
|--------------|-------------------------|
| UiO-66       | -10.2                   |
| UiO-66-0.7Ti | 4.8                     |
| UiO-66-1.4Ti | 25.9                    |
| UiO-66-2.1Ti | 57.1                    |
| UiO-66-2.7Ti | 59.2                    |
| UiO-66-4.0Ti | 60.0                    |

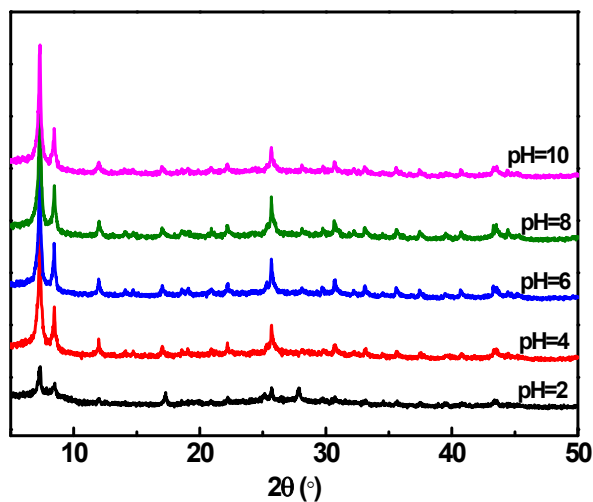

Fig. S6 XRD patterns of UiO-66-2.7Ti after the adsorption of CR at various pHs.

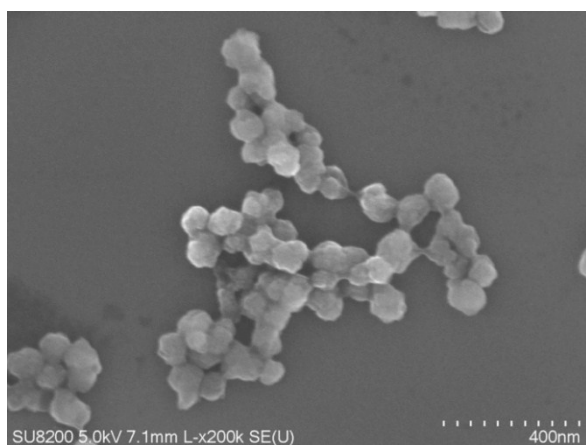

Fig. S7 SEM image of CR-adsorbed UiO-66-2.7Ti.

## References

- 1 H. C. Choi, Y. M. Jung and S. B. Kim, *Vib. Spectrosc.*, 2005, **37**, 33–38.
- 2 M. Kandiah, M. H. Nilsen, S. Usseglio, S. Jakobsen, U. Olsbye, M. Tilset, C. Larabi, E. A. Quadrelli, F. Bonino and K. P. Lillerud, *Chem. Mater.*, 2010, **22**, 6632–6640.
- 3 L. Valenzano, B. Civaleri, S. Chavan, S. Bordiga, M. H. Nilsen, S. Jakobsen, K. P. Lillerud and C. Lamberti, *Chem. Mater.*, 2011, **23**, 1700–1718.
- 4 J. S. Wu, J. S. Wang, H. Y. Li, Y. C. Du, K. L. Huang and B. X. Liu, *J. Mater.*



- Chem. A*, 2013, **1**, 9837–9847.
- 5 H. L. Zhang, X. C. Li, G. H. He, J. J. Zhan and D. Liu, *Ind. Eng. Chem. Res.*, 2013, **52**, 16902–16910.
- 6 S. K. Wu, X. P. Shen, H. Zhou, G. X. Zhu, R. Y. Wang, Z. Y. Ji, K. M. Chen and C. J. Chen, *J. Colloid Interface Sci.*, 2016, **464**, 191–197.
